# Supplementary material for: Identification of putative unique immunogenic ZIKV and DENV1-4 peptides for diagnostic cellular based tests
Source: PubMed Central journal article supplement (PMC5524841; doi:10.1038/s41598-017-05980-z), 2017-07-24
Supplement: 41598_2017_5980_MOESM1_ESM.pdf [file 41598_2017_5980_MOESM1_ESM.pdf]

**Identification of putative unique immunogenic ZIKV and DENV1-4 peptides for diagnostic  
cellular based tests**

**Aaron L. Oom, Davey Smith, Kevan Akrami**

Supplemental Table S1: MHC class I reference allele set

|             |
|-------------|
| HLA-A*01:01 |
| HLA-A*02:01 |
| HLA-A*02:03 |
| HLA-A*02:06 |
| HLA-A*03:01 |
| HLA-A*11:01 |
| HLA-A*23:01 |
| HLA-A*24:02 |
| HLA-A*26:01 |
| HLA-A*30:01 |
| HLA-A*30:02 |
| HLA-A*31:01 |
| HLA-A*32:01 |
| HLA-A*33:01 |
| HLA-A*68:01 |
| HLA-A*68:02 |
| HLA-B*07:02 |
| HLA-B*08:01 |
| HLA-B*15:01 |
| HLA-B*35:01 |
| HLA-B*40:01 |
| HLA-B*44:02 |
| HLA-B*44:03 |
| HLA-B*51:01 |
| HLA-B*53:01 |
| HLA-B*57:01 |
| HLA-B*58:01 |

Supplemental Table S2: MHC class II reference allele set

|                           |
|---------------------------|
| HLA-DRB1*01:01            |
| HLA-DRB1*03:01            |
| HLA-DRB1*04:01            |
| HLA-DRB1*04:05            |
| HLA-DRB1*07:01            |
| HLA-DRB1*08:02            |
| HLA-DRB1*09:01            |
| HLA-DRB1*11:01            |
| HLA-DRB1*12:01            |
| HLA-DRB1*13:02            |
| HLA-DRB1*15:01            |
| HLA-DRB3*01:01            |
| HLA-DRB3*02:02            |
| HLA-DRB4*01:01            |
| HLA-DRB5*01:01            |
| HLA-DQA1*05:01/DQB1*02:01 |
| HLA-DQA1*05:01/DQB1*03:01 |
| HLA-DQA1*03:01/DQB1*03:02 |
| HLA-DQA1*04:01/DQB1*04:02 |
| HLA-DQA1*01:01/DQB1*05:01 |
| HLA-DQA1*01:02/DQB1*06:02 |
| HLA-DPA1*02:01/DPB1*01:01 |
| HLA-DPA1*01:03/DPB1*02:01 |
| HLA-DPA1*01/DPB1*04:01    |
| HLA-DPA1*03:01/DPB1*04:02 |
| HLA-DPA1*02:01/DPB1*05:01 |
| HLA-DPA1*02:01/DPB1*14:01 |

Supplemental Table S3: ZIKV peptides and predicted HLA binders

| <b>NS1 Residues</b> | <b>Sequence</b>      | <b>Alleles</b>                                                                                                        |
|---------------------|----------------------|-----------------------------------------------------------------------------------------------------------------------|
| 16-24/25            | KETRCGTGV/KETRCGTGVF | B*40:01, B*44:02, B*44:03                                                                                             |
| 125-133             | KSYFVRAAK            | A*03:01, A*11:01, A*30:01, A*31:01                                                                                    |
| 158-167             | FLVEDHGFGV           | A*02:01, A*02:03, A*02:06                                                                                             |
| 166-175             | GVFHTSVWLK           | A*03:01, A*11:01, A*68:01, DPA1*02:01/DPB1*01:01,<br>DPA1*01:03/DPB1*02:01, DPA1*01/DPB1*04:01, DPA1*03:01/DPB1*04:02 |
| 169-177             | HTSVWLKVR            | A*31:01, A*33:01, A*68:01, DPA1*02:01/DPB1*01:01,<br>DPA1*01:03/DPB1*02:01, DPA1*01/DPB1*04:01, DPA1*03:01/DPB1*04:02 |

Supplemental Table S4: DENV peptides and predicted HLA binders

| <b>Serotype</b>  | <b>Residues</b> | <b>Sequence</b>          | <b>Predicted Alleles</b>                                                                                                                                                                                        |
|------------------|-----------------|--------------------------|-----------------------------------------------------------------------------------------------------------------------------------------------------------------------------------------------------------------|
| <b>1</b>         | 31-39/40        | MLMTGTLAV/<br>MLMTGTLAVF | A*02:01, A*02:03, A*02:06, A*23:01, A*24:02, A*32:01, A*68:02, B*08:01, B*15:01, B*35:01, DPA1*01:03/DPB1*02:01, DPA1*01/DPB1*04:01                                                                             |
| <b>2</b>         | 33-41           | ILLVAVSFV                | A*02:01, A*02:03, A*02:06, DPA1*01:03/DPB1*02:01, DPA1*01/DPB1*04:01, DQA1*04:01/DQB1*04:02                                                                                                                     |
|                  | 63-72           | TMTDDIGMGV               | A*02:01, A*02:03, A*02:06                                                                                                                                                                                       |
| <b>3</b>         | 31-40           | HMIAGVFFTF               | A*23:01, A*24:02, B*15:01, DPA1*01:03/DPB1*02:01, DPA1*01/DPB1*04:01, DPA1*03:01/DPB1*04:02, DPA1*02:01/DPB1*05:01, DRB1*11:01                                                                                  |
|                  | 32-40/41        | MIAGVFFTF/<br>MIAGVFFTFV | A*02:01, A*02:03, A*02:06, A*23:01, A*24:02, A*26:01, A*32:01, A*68:02, B*15:01, B*35:01, B*53:01, B*58:01, DPA1*01:03/DPB1*02:01, DPA1*01/DPB1*04:01, DPA1*03:01/DPB1*04:02, DPA1*02:01/DPB1*05:01, DRB1*11:01 |
|                  | 157-<br>165/166 | TIFTLTVAW/<br>TIFTLTVAWR | A*31:01, A*32:01, A*33:01, A*68:01, B*57:01, DRB1*07:01                                                                                                                                                         |
| <b>4</b>         | 81-90           | KMSPGYVLGV               | A*02:01, A*02:03, A*02:06, DRB1*01:01, DRB1*09:01, DRB3*02:02, DRB5*01:01                                                                                                                                       |
| <b>Consensus</b> | 15-23/24        | MAIFIEEVM/<br>MAIFIEEVMR | A*33:01, A*68:01, B*35:01, B*53:01, B*57:01, B*58:01, DRB1*03:01, DRB1*11:01                                                                                                                                    |
|                  | 42-50/51        | LLIMGQLTW/<br>LLIMGQLTWR | A*31:01, B*53:01, B*58:01, DRB1*11:01, DRB5*01:01                                                                                                                                                               |
|                  | 86-94/95        | MFAVGLLLR/<br>MFAVGLLLRK | A*03:01, A*31:01, A*33:01, A*68:01, DRB1*11:01, DPA1*01/DPB1*04:01, DPA1*03:01/DPB1*04:02                                                                                                                       |
|                  | 132-140         | MMLKLVTNF                | A*23:01, A*32:01, B*15:01, DPA1*02:01/DPB1*05:01, DRB5*01:01                                                                                                                                                    |
|                  | 143-152         | YQLWTTLLSL               | A*02:01, A*02:06, B*15:01, DPA1*01/DPB1*04:01, DPA1*03:01/DPB1*04:02, DPA1*02:01/DPB1*14:01, DRB1*04:01, DRB1*11:01                                                                                             |
|                  | 170-178         | MVLAVVSLF                | A*23:01, A*26:01, B*35:01, B*57:01, B*58:01, DPA1*02:01/DPB1*01:01, DRB1*03:01                                                                                                                                  |
